# Supplementary material for: Nitrogen-doped carbon supports with terminated hydrogen and their effects on active gold species: a density functional study
Source: Royal Society of Chemistry journal article supplement (doi:10.1039/c4cp01793e), 2014-01-01
Supplement: c4cp01793e1.pdf [file c4cp01793e1.pdf]

## Supporting Information

### **Nitrogen-doped carbon supports with terminated hydrogen and their effects on active gold species: A density functional study**

Junjie Gu, Qian Du, You Han, Zhenghua He, Wei Li and Jinli Zhang\*

School of Chemical Engineering and Technology, Tianjin University, Tianjin 300072,  
P. R. China

#### Contents

Figure S1. The deformation electron density of different support of (a) GR, (b) GRN-I, (c) GRN-II and (d) GRN-III.

Figure S2. DOS of four supports (a) GR (b) GRN-I (c) GRN-II (d) GRN-III. The red shadow means the contribution of N atom in the total DOS curve.

Figure S3. PDOS of H, N atom on N-doped graphene and H, C atom on pristine graphene are arranged from top to bottom

Figure S4. PDOS of Au dimer and H after adsorption for different support (a) GR (b) GRN-I

Figure S5. Mulliken charges (red numbers) on the (a) triangular model or (b) tetragonal model. Color index: Au atom-yellow; Cl atom-green

Figure S6: The charge distribution of (a) GR before and after  $\text{Au}_2\text{Cl}_2$  adsorption (b).

Figure S7: The charge distribution of GRN-I (a) before and after  $\text{Au}_2\text{Cl}_2$  adsorption (b).

Figure S8. The initial position of HCl on the adsorbed  $\text{Au}_2\text{Cl}_6$  with the support of GR.

Color index: bond length ( $\text{\AA}$ ), red

Figure S9. The initial positions of  $\text{C}_2\text{H}_2$  and HCl on  $\text{Au}_2\text{Cl}_6/\text{GRN-I}$ .

Table S1. Charge distribution of Au dimer on different supports

Table S2. Mulliken charge of HCl adsorbed on  $\text{Au}_2\text{Cl}_6/\text{supports}$

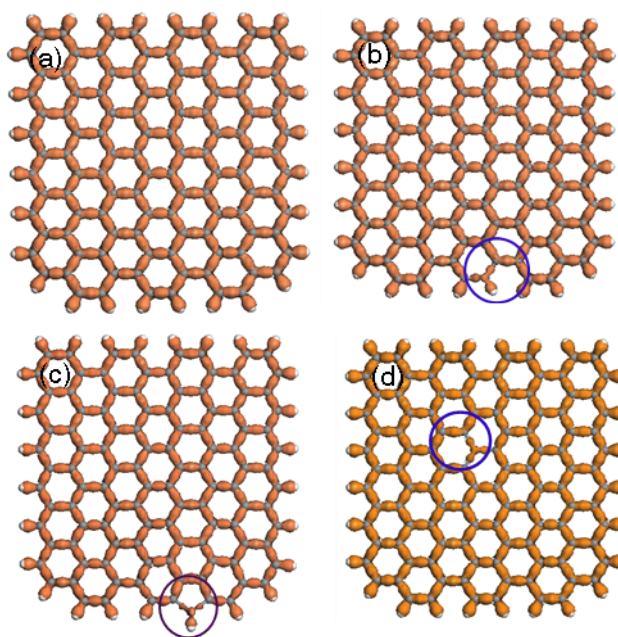

Figure S1. The deformation electron density of different support of (a)GR, (b) GRN-I,

(c) GRN-II and (d) GRN-III. The purple circles show the N-doped site.

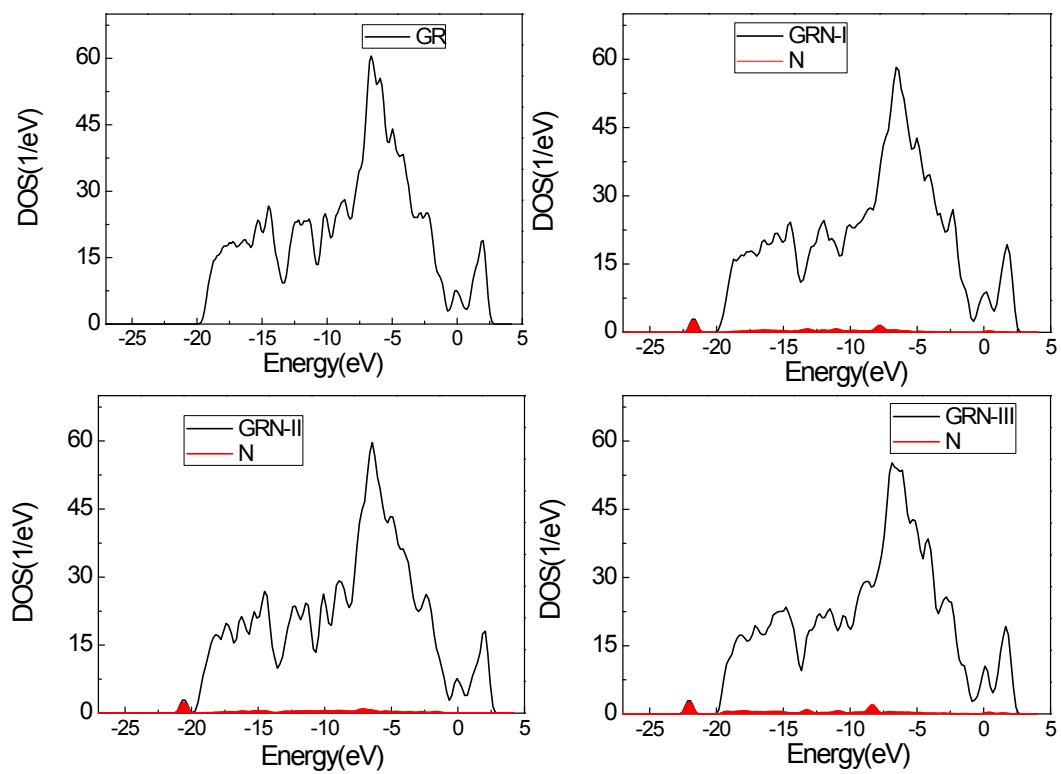

Figure S2. DOS of four supports (a) GR (b) GRN-I (c) GRN-II (d) GRN-III. The red shadow means the contribution of N atom in the total DOS curve.

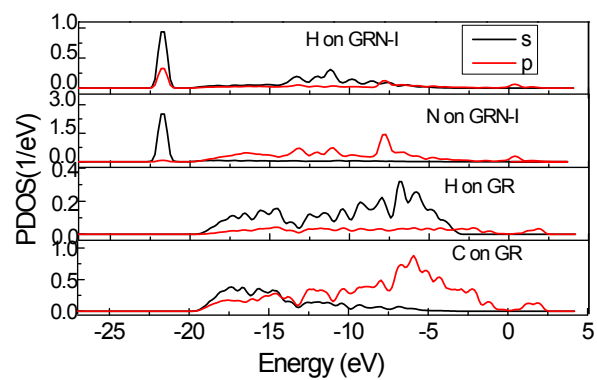

Figure S3. PDOS of H, N atom on N-doped graphene and H, C atom on pristine graphene are arranged from top to bottom

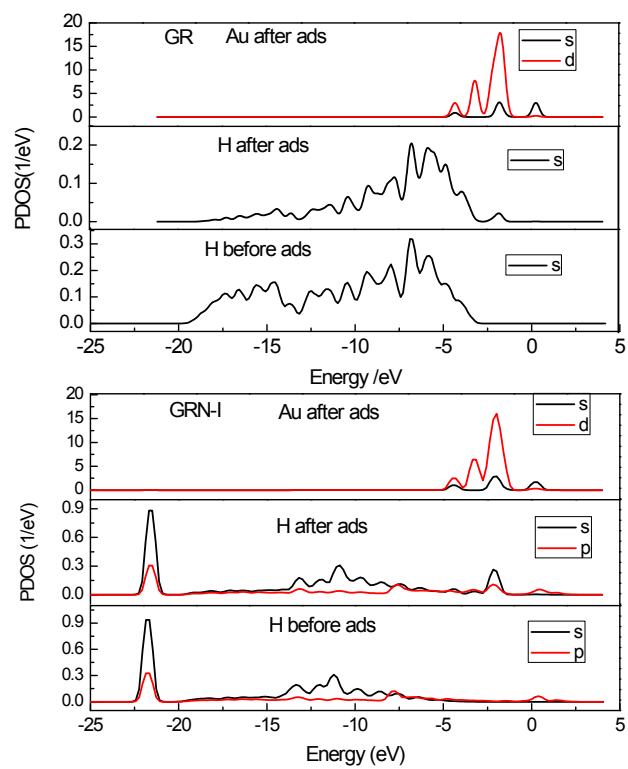

Figure S4. PDOS of Au dimer and H after adsorption for different support (a) GR (b)

GRN-I

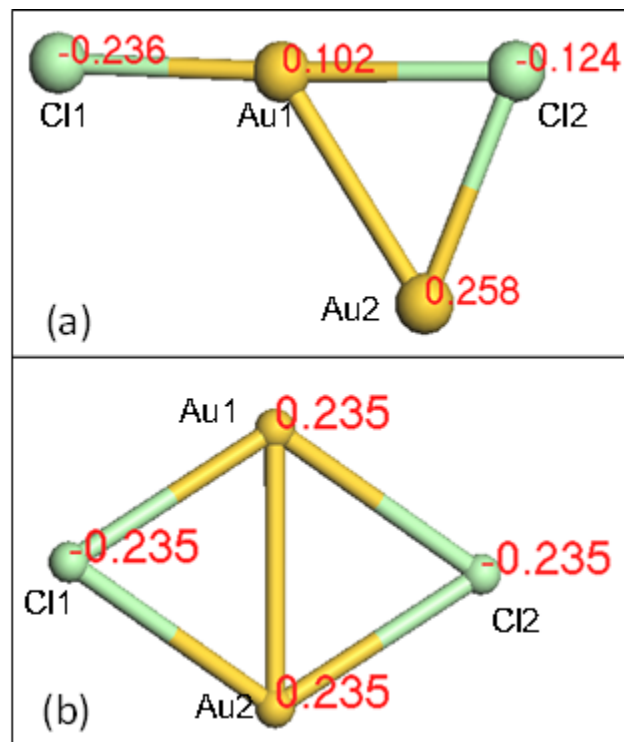

Figure S5. Mulliken charges (red numbers) on the (a) triangular model or (b) tetragonal model. Color index: Au atom-yellow; Cl atom-green.

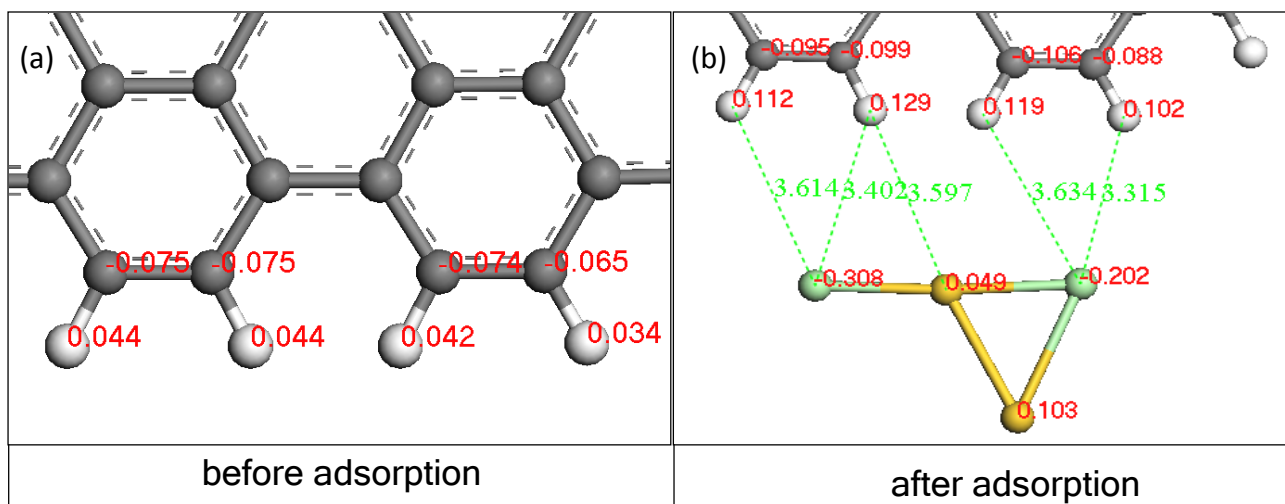

Figure S6. The charge distribution of (a) GR before and after  $\text{Au}_2\text{Cl}_2$  adsorption (b).

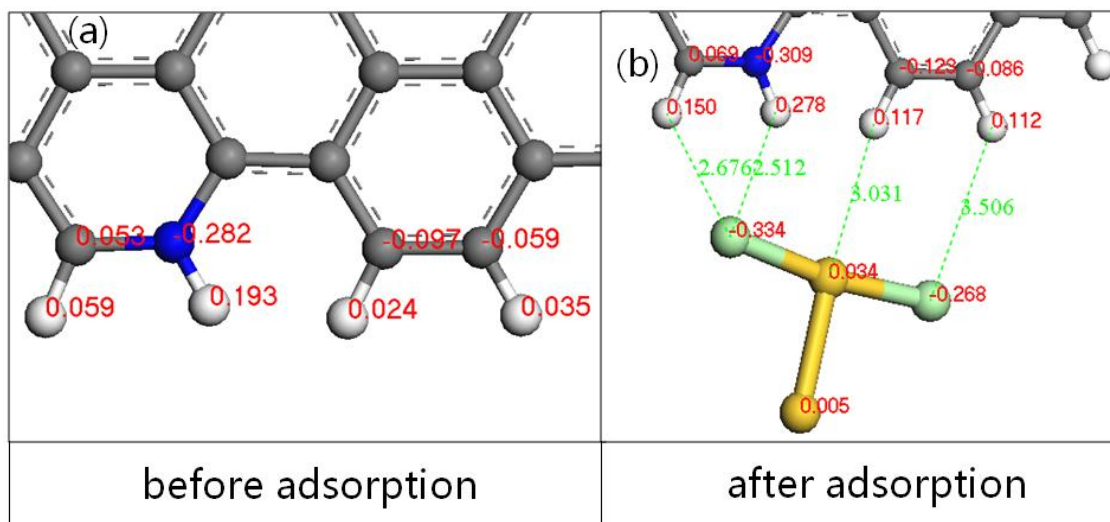

Figure S7. The charge distribution of GRN-I (a) before and after  $\text{Au}_2\text{Cl}_2$  adsorption

(b).



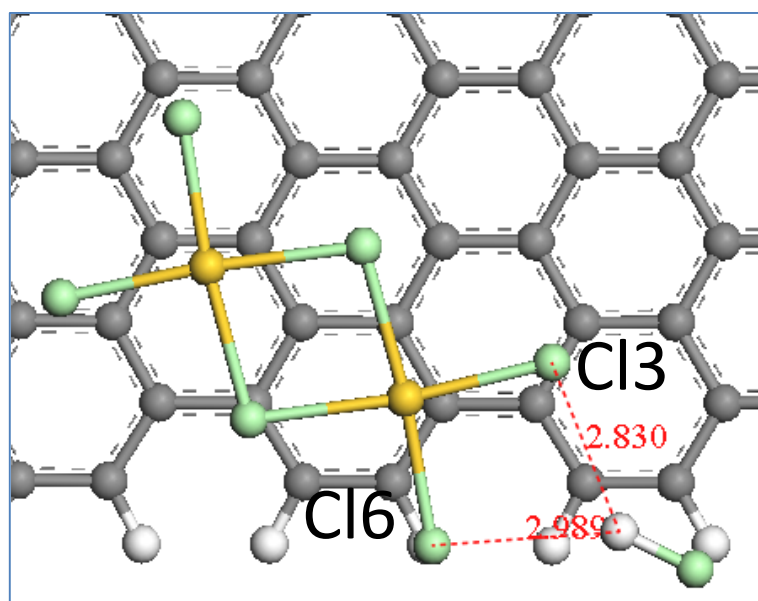

Figure S8. The initial position of HCl on the adsorbed Au<sub>2</sub>Cl<sub>6</sub> with the support of GR.

Color index: bond length (Å), red

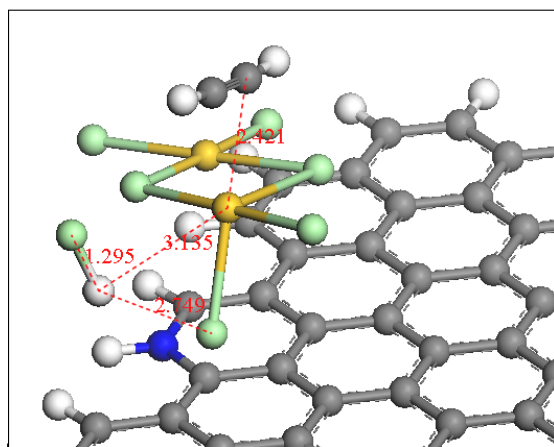

Figure S9. The initial positions of  $C_2H_2$  and  $HCl$  on  $Au_2Cl_6/GRN-I$ .

Table S1. Charge distribution of Au dimer on different supports

| Atom number  | Au<br>dimer | GR     | GRN-I  | GRN-II | GRN-III |
|--------------|-------------|--------|--------|--------|---------|
| Au1          | 0           | -0.069 | -0.184 | -0.110 | -0.076  |
| Au2          | 0           | -0.069 | -0.149 | -0.078 | -0.059  |
| Total charge | 0           | -0.138 | -0.333 | -0.188 | -0.135  |

Table S2. Mulliken charge of HCl adsorbed on Au<sub>2</sub>Cl<sub>6</sub>/supports

|              | Gas phase | GR     | GRN-I  | GRN-II | GRN-III |
|--------------|-----------|--------|--------|--------|---------|
| H            | 0.128     | 0.202  | 0.197  | 0.205  | 0.197   |
| Cl           | -0.128    | -0.237 | -0.246 | -0.246 | -0.244  |
| Total charge | 0         | -0.035 | -0.049 | -0.041 | -0.047  |
